# Supplementary material
Source: PubMed Central journal article supplement (PMC6555695)
Supplement: NIHMS1511807-supplement-1.pdf [file NIHMS1511807-supplement-1.pdf]

Supplemental Table 1

*Participants with an Adaptive Behavior Discrepancy by Diagnostic Group*

| Vineland Subdomain         | ASD       | BAP        | UA         | TD        |
|----------------------------|-----------|------------|------------|-----------|
| <i>Communication</i>       |           |            |            |           |
| 12 Months                  | 2 (9.5%)  | 2 (1.5%)   | 4 (13.8%)  | 4 (4.2%)  |
| 24 Months                  | 1 (4.8%)  | 1 (5.3%)   | 0 (0%)     | 0 (0%)    |
| 36 Months                  | 0 (0%)    | 2 (1.5%)   | 1 (3.5%)   | NA        |
| <i>Daily Living Skills</i> |           |            |            |           |
| 12 Months                  | 7 (33.3%) | 3 (15.8%)  | 3 (1.3%)   | 29 (3.2%) |
| 24 Months                  | 4 (19.1%) | 9 (47.4%)  | 6 (2.7%)   | 8 (8.3%)  |
| 36 Months                  | 9 (42.9%) | 11 (57.9%) | 10 (34.5%) | NA        |
| <i>Socialization</i>       |           |            |            |           |
| 12 Months                  | 3 (14.3%) | 0 (0%)     | 2 (6.9%)   | 0 (0%)    |
| 24 Months                  | 5 (23.8%) | 3 (15.8%)  | 1 (3.5%)   | 3 (3.1%)  |
| 36 Months                  | 7 (33.3%) | 8 (42.1%)  | 4 (13.8%)  | NA        |

Supplemental Table 2

*Between-Group Pairwise Comparison p-values for Proportion of Participants with an Adaptive Behavior Discrepancy*

| Vineland Subdomain         | 12 Months |       |      | 24 Months |          |       | 36 Months |       |     |
|----------------------------|-----------|-------|------|-----------|----------|-------|-----------|-------|-----|
|                            | ASD       | BAP   | UA   | ASD       | BAP      | UA    | ASD       | BAP   | UA  |
| <i>Communication</i>       |           |       |      |           |          |       |           |       |     |
| ASD                        | ---       |       |      | ---       |          |       | ---       |       |     |
| BAP                        | 1.000     | ---   |      | 1.000     | ---      |       | .219      | ---   |     |
| UA                         | 1.000     | 1.000 | ---  | .420      | .396     | ---   | 1.000     | .554  | --- |
| TD                         | .293      | .258  | .084 | .180      | .165     | NA    | NA        | NA    | NA  |
| <i>Daily Living Skills</i> |           |       |      |           |          |       |           |       |     |
| ASD                        | ---       |       |      | ---       |          |       | ---       |       |     |
| BAP                        | .281      | ---   |      | .092      | ---      |       | .527      | ---   |     |
| UA                         | .073      | .669  | ---  | 1.000     | .064     | ---   | .570      | .143  | --- |
| TD                         | .798      | .268  | .050 | .224      | <.001*** | .090  | NA        | NA    | NA  |
| <i>Socialization</i>       |           |       |      |           |          |       |           |       |     |
| ASD                        | ---       |       |      | ---       |          |       | ---       |       |     |
| BAP                        | .233      | ---   |      | .698      | ---      |       | .745      | ---   |     |
| UA                         | .638      | .516  | ---  | .070      | .286     | ---   | .166      | .041* | --- |
| TD                         | .005**    | NA    | .052 | .005**    | .056     | 1.000 | NA        | NA    | NA  |

$p < .05^*$ ,  $p < .01^{**}$ ,  $p < .001^{***}$ ; <sup>2</sup>P-values calculated using Chi-square tests of independence or Fisher's exact tests, as appropriate

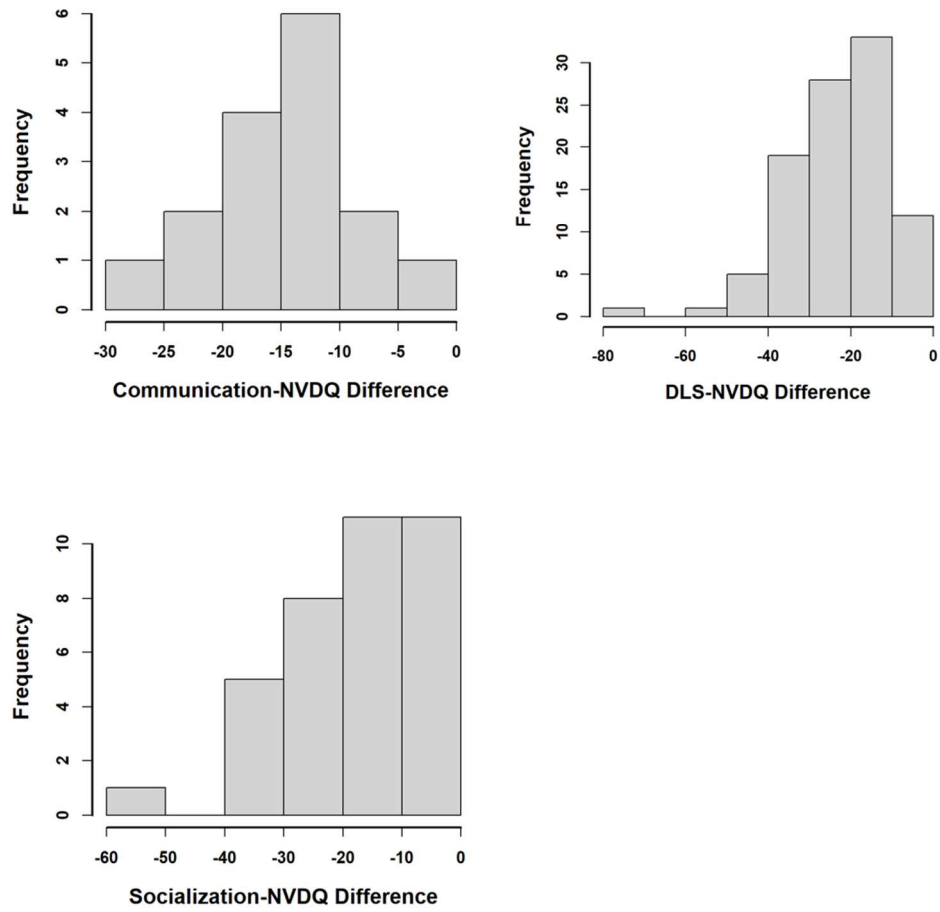

*Supplemental Figure 1.* Histograms of the standard score difference between each Vineland subdomain and NVDQ for all participants who had a discrepancy at any time point: Communication and NVDQ (N=17), Daily Living Skills (DLS) and NVDQ (N=99), and Socialization and NVDQ (N=36).
